# Supplementary material for: Unrevealing the potential of multicomponent metal-ion incorporation and sulfide modification in cobalt oxide for efficient water oxidation
Source: Royal Society of Chemistry journal article supplement (doi:10.1039/d4ya00327f), 2024-01-01
Supplement: d4ya00327f1.pdf [file d4ya00327f1.pdf]

## **Unrevealing the multicomponent Metal ion incorporation and sulfide modification in cobalt oxide for efficient water Oxidation**

Muzzayab Masood<sup>1</sup>, Muhammad Aamir<sup>1\*</sup>, Muhammad Ejaz Khan<sup>2</sup>, Muhammad Sher<sup>3</sup>, Khush Bakhat Akram,<sup>4</sup> Hafiz Zahid Shafi,<sup>5</sup> Hamad Almohamadi,<sup>6</sup> Md. Akhtaruzzaman,<sup>\*7</sup> Md. Shahiduzzaman,<sup>8</sup>

<sup>1</sup> Department of Chemistry, Mirpur University of Science and Technology(MUST), Mirpur-10250 (AJK), Pakistan.

<sup>2</sup> Department of Computer Engineering, National University of Technology, Islamabad 44000, Pakistan

<sup>3</sup>Department of Chemistry, Allama Iqbal Open University, H-8, Islamabad, Pakistan.

<sup>4</sup>Applied Sciences and Humanities Department, National University of Technology, Islamabad 44000, Pakistan

<sup>5</sup>Materials Division, National Institute of Lasers & Optronics College (NILOP-C), Pakistan Institute of Engineering & Applied Science (PIEAS), P.O. Nilore 45650, Islamabad, Pakistan.

<sup>6</sup>Department of Chemical Engineering, Faculty of Engineering, Islamic University of Madinah, Madinah, Abo Bakr Al Siddiq, Al Jamiah, Madinah 42351, Saudi Arabia

<sup>7</sup>The Department of Chemistry, Faculty of Science, The Islamic University of Madinah, Madinah, Abo Bakr Al Siddiq, Al Jamiah, Madinah 42351, Saudi Arabia

<sup>8</sup>Nanomaterials Research Institute, Kanazawa University, Kakuma, Kanazawa 920-1192, Japan

\*Corresponding Authors:

Muhammad Aamir Email: [amir.chem@must.edu.pk](mailto:amir.chem@must.edu.pk)

**Table S1.** Comparison of overpotential and Tafel slope values of the various reported cobalt based electrocatalysts for OER activity with the as-synthesized electrocatalysts.

| Catalyst                                                                                     | Electrolyte | Overpotential (mV)<br>at 10 mAcm <sup>-2</sup> | Tafel Slope<br>(mV dec <sup>-1</sup> ) | Ref.     |
|----------------------------------------------------------------------------------------------|-------------|------------------------------------------------|----------------------------------------|----------|
| CdCoO                                                                                        | 1 M KOH     | 208                                            | 81.98                                  | Our Work |
| CdCoS                                                                                        | 1 M KOH     | 199                                            | 63.45                                  | Our Work |
| CdCoO@CuCoO                                                                                  | 1 M KOH     | 215                                            | 83.05                                  | Our Work |
| CdCoS@CuCoS                                                                                  | 1 M KOH     | 208                                            | 69.91                                  | Our Work |
| Co <sub>3</sub> O <sub>4</sub> -GC                                                           | 1 M KOH     | 350                                            | 60.5                                   | [1]      |
| La <sub>x</sub> Sr <sub>1-x</sub> CoO <sub>3-δ</sub> -GC                                     | 1 M KOH     | 250                                            | NA                                     | [2]      |
| Co <sub>2</sub> FeO <sub>4</sub> -GC                                                         | 1 M KOH     | 359                                            | 43                                     | [3]      |
| CoOOH-CC                                                                                     | 1 M KOH     | 426                                            | 60                                     | [4]      |
| Zn <sub>0.2</sub> Co <sub>0.8</sub> OOH-GC                                                   | 1 M KOH     | 235                                            | 35.7                                   | [5]      |
| LiCoO <sub>1.8</sub> ClO <sub>1.2</sub> -GC                                                  | 1 M KOH     | 276.8                                          | 55.4                                   | [6]      |
| NiCo <sub>2</sub> O <sub>4</sub> -CP                                                         | 1 M KOH     | 270                                            | 39                                     | [7]      |
| SrCoO <sub>3-δ</sub> -GC                                                                     | 1 M KOH     | 417                                            | 66                                     | [8]      |
| FeCoSe <sub>2</sub> -GC                                                                      | 1 M KOH     | 370                                            | 53.5                                   | [9]      |
| Fe <sub>3</sub> Co(PO <sub>4</sub> ) <sub>4</sub> -GC                                        | 1 M KOH     | 237                                            | 57                                     | [10]     |
| CoAl <sub>2</sub> O <sub>4</sub> -GC                                                         | 1 M KOH     | 290                                            | 70                                     | [11]     |
| Zn <sub>0.35</sub> Co <sub>0.65</sub> O-GC                                                   | 1 M KOH     | 290                                            | 42.6                                   | [12]     |
| CoFe <sub>2</sub> O <sub>4</sub> -NF                                                         | 1 M KOH     | 248                                            | 54.2                                   | [13]     |
| CaCoO <sub>3</sub> -GC                                                                       | 1 M KOH     | 260                                            | 38                                     | [14]     |
| Co <sub>2</sub> (OH) <sub>3</sub> Cl-GC                                                      | 1 M KOH     | 270                                            | 42                                     | [15]     |
| Co <sub>3</sub> Sn <sub>2</sub> S <sub>2</sub> -CW                                           | 1 M KOH     | 300                                            | 74                                     | [16]     |
| γ-CoOOH-CC                                                                                   | 1 M KOH     | 300                                            | 38                                     | [17]     |
| CoS-Co(OH) <sub>2</sub> -NF                                                                  | 1 M KOH     | 380                                            | 68                                     | [18]     |
| GC = Glassy Carbon, NF = Nickel Foam, CC = Carbon Cloth, CW = Copper Wire, CP = Carbon Paper |             |                                                |                                        |          |

1. Zhang, R., et al., *Tracking the role of defect types in Co<sub>3</sub>O<sub>4</sub> structural evolution and active motifs during oxygen evolution reaction*. Journal of the American Chemical Society, 2023. **145**(4): p. 2271-2281.
2. Lu, M., et al., *Artificially steering electrocatalytic oxygen evolution reaction mechanism by regulating oxygen defect contents in perovskites*. Science advances, 2022. **8**(30): p. eabq3563.
3. Xiang, W., et al., *3D atomic-scale imaging of mixed Co-Fe spinel oxide nanoparticles during oxygen evolution reaction*. Nature Communications, 2022. **13**(1): p. 179.
4. Wang, S., et al., *Identifying the geometric catalytic active sites of crystalline cobalt oxyhydroxides for oxygen evolution reaction*. Nature Communications, 2022. **13**(1): p. 6650.

5. Huang, Z.-F., et al., *Chemical and structural origin of lattice oxygen oxidation in Co–Zn oxyhydroxide oxygen evolution electrocatalysts*. *Nature Energy*, 2019. **4**(4): p. 329-338.
6. Wang, J., et al., *Redirecting dynamic surface restructuring of a layered transition metal oxide catalyst for superior water oxidation*. *Nature Catalysis*, 2021. **4**(3): p. 212-222.
7. Li, J., et al., *Boosted oxygen evolution reactivity by igniting double exchange interaction in spinel oxides*. *Journal of the American Chemical Society*, 2019. **142**(1): p. 50-54.
8. Pan, Y., et al., *Direct evidence of boosted oxygen evolution over perovskite by enhanced lattice oxygen participation*. *Nature communications*, 2020. **11**(1): p. 2002.
9. Dou, Y., et al., *Approaching the activity limit of CoSe<sub>2</sub> for oxygen evolution via Fe doping and Co vacancy*. *Nature Communications*, 2020. **11**(1): p. 1664.
10. Sultan, S., et al., *Superb water splitting activity of the electrocatalyst Fe<sub>3</sub>Co (PO<sub>4</sub>)<sub>4</sub> designed with computation aid*. *Nature Communications*, 2019. **10**(1): p. 5195.
11. Wu, T., et al., *Iron-facilitated dynamic active-site generation on spinel CoAl<sub>2</sub>O<sub>4</sub> with self-termination of surface reconstruction for water oxidation*. *Nature Catalysis*, 2019. **2**(9): p. 763-772.
12. Wahl, S., et al., *Zn<sub>0.35</sub>Co<sub>0.65</sub>O–A stable and highly active oxygen evolution catalyst formed by zinc leaching and tetrahedral coordinated cobalt in wurtzite structure*. *Advanced Energy Materials*, 2019. **9**(20): p. 1900328.
13. Huang, L., et al., *Zirconium-regulation-induced bifunctionality in 3D cobalt–iron oxide nanosheets for overall water splitting*. *Advanced Materials*, 2019. **31**(28): p. 1901439.
14. Li, X., et al., *Exceptional oxygen evolution reactivities on CaCoO<sub>3</sub> and SrCoO<sub>3</sub>*. *Science advances*, 2019. **5**(8): p. eaav6262.
15. Jiang, H., et al., *Tracking structural self-reconstruction and identifying true active sites toward cobalt oxychloride precatalyst of oxygen evolution reaction*. *Advanced Materials*, 2019. **31**(8): p. 1805127.
16. Li, G., et al., *Surface states in bulk single crystal of topological semimetal Co<sub>3</sub>Sn<sub>2</sub>S<sub>2</sub> toward water oxidation*. *Science Advances*, 2019. **5**(8): p. eaaw9867.
17. Seh, Z.W., et al., *Combining theory and experiment in electrocatalysis: Insights into materials design*. *Science*, 2017. **355**(6321): p. eaad4998.
18. Yoon, T. and K.S. Kim, *One-Step Synthesis of CoS-Doped  $\beta$ -Co (OH)<sub>2</sub>@ Amorphous MoS<sub>2</sub>+ x Hybrid Catalyst Grown on Nickel Foam for High-Performance Electrochemical Overall Water Splitting*. *Advanced Functional Materials*, 2016. **26**(41): p. 7386-7393.
